# Supplementary material for: A Functional Variant of the Adipocyte Glycerol Channel Aquaporin 7 Gene Is Associated With Obesity and Related Metabolic Abnormalities
Source: Oxford University Press journal article supplement (doi:10.2337/db06-1389), 2007-04-30
Supplement: db061389-sup-1389online2.doc [file db061389-sup-1389online2.doc]

**Table 1.** SNPs included in the bloks partitioning

| **N°** | **dbSNP id** | **Position on**  **chromosome 9p** | **Block** |
| --- | --- | --- | --- |
| 2 | rs12685523 | 33349097 | 1 |
| 4 | rs831266 | 33349575 | 1 |
| 7 | rs4879688 | 33356398 | 1 |
| 8 | rs12237401 | 33357088 | 1 |
| 10 | rs12686729 | 33358648 | 1 |
| 11 | rs2230122 | 33359943 | 1 |
| 12 | rs11788376 | 33362396 | 1 |
| 14 | rs4879689 | 33364082 | 1 |
| 22 | rs4879691 | 33374458 | 1 |
| 25 | rs2247654 | 33374569 | 1 |
| 28 | **rs13434** | 33374977 | 2 |
| 29 | **rs590111** | 33375439 | 2 |
| 53 | **rs4879696** | 33388606 | 3 |
| 56 | **rs2989924** | 33393470 | 3 |
| 58 | **rs3758268** | 33394401 | 4 |
| 59 | **rs3758267** | 33394808 | 4 |
| 62 | rs7029953 | 33396297 | 4 |
| 63 | rs12342594 | 33396609 | 4 |
| 64 | rs12351969 | 33396907 | 4 |
| 65 | rs12351974 | 33396933 | 4 |
| 66 | rs10813971 | 33397780 | 4 |
| 68 | rs17337873 | 33398019 | 4 |
| 70 | rs7039308 | 33398939 | 4 |
| 71 | rs7028955 | 33399752 | 4 |
| 72 | rs10971492 | 33399797 | 4 |
| 79 | rs2777738 | 33404173 | 5 |
| 81 | rs10813973 | 33404243 | 5 |
| 82 | rs477789 | 33404650 | 5 |
| 84 | rs3892492 | 33405974 | 6 |
| 85 | rs17253114 | 33406380 | 6 |
| 88 | rs17253142 | 33406871 | 6 |
| 89 | rs2992816 | 33407096 | 6 |
| 90 | rs16919246 | 33407721 |  |

SNPs in the AQP7 locus are in bold
