# Supplementary material for: A Functional Variant of the Adipocyte Glycerol Channel Aquaporin 7 Gene Is Associated With Obesity and Related Metabolic Abnormalities
Source: Oxford University Press journal article supplement (doi:10.2337/db06-1389), 2007-04-30
Supplement: db061389-sup-1389online3.doc [file db061389-sup-1389online3.doc]

**Figure 2.** LD degree among SNPs of AQP7 gene identified by resequencing of the screening sample in the present study

**
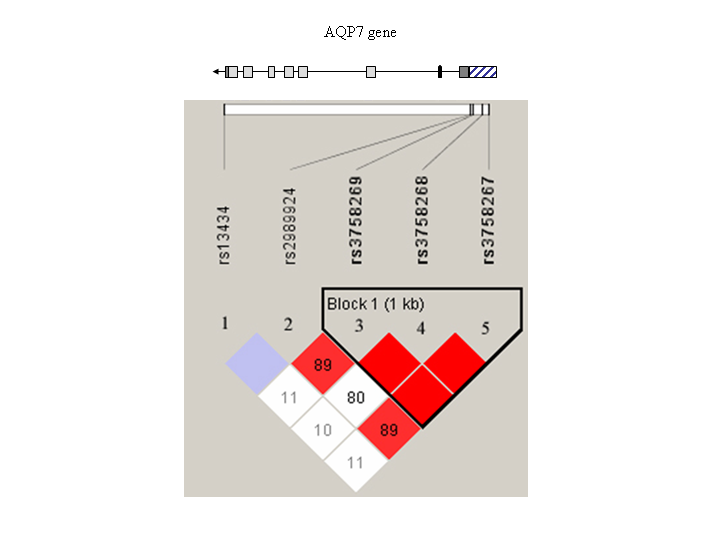
**

Output of Haploview program showing LD block structure as defined by *Solid Spine* of LD (D’ > 0.9) across 18Kbp of the AQP genomic region as estimated among the five SNPs identified on the screening sample resequenced in the present study.

The upper panel shows the AQP7 gene organization. Solid grey boxes show exons, while thick line shows introns; dark grey boxes corresponds to UTRs and striped box corresponds to the promoter.

Individual SNP IDs according to NCBI dbSNP are indicated. A single block is shown by the thick lines along the triangle legs.

The five-color scheme (*white* to *red*) in the lower panel represents the increasing strength of LD. Values for *D’* (x100) are shown, but those boxes with D’=1 are shaded in bright red and are empty. Cells with D’<1 are shades of pink or red. Blue represents D’=1 but with a low confidence estimate for *D’*.
